# Supplementary material for: Room-temperature synthesis of silica supported silver nanoparticles in basic ethanol solution and their antibacterial activity
Source: Royal Society of Chemistry journal article supplement (doi:10.1039/c5ra27053g), 2016-01-01
Supplement: c5ra27053g1.pdf [file c5ra27053g1.pdf]

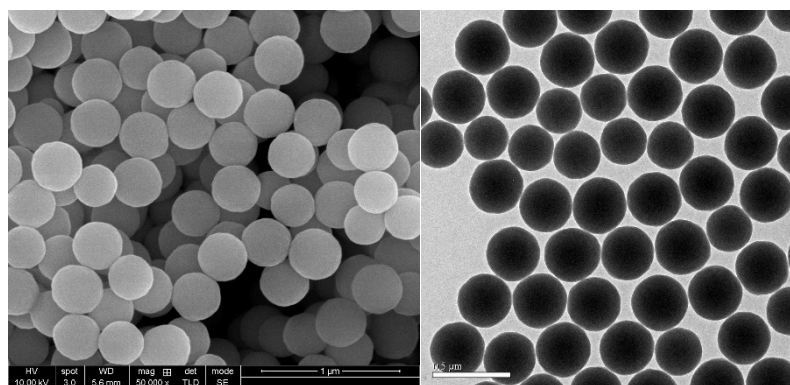

Fig. S1 SEM and TEM image of as-prepared silica spheres

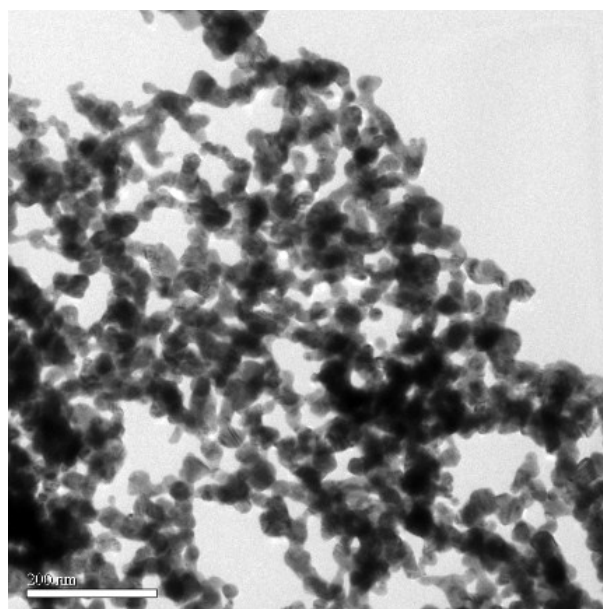

Fig. S2 TEM image of silver particles prepared with the same method as the composite

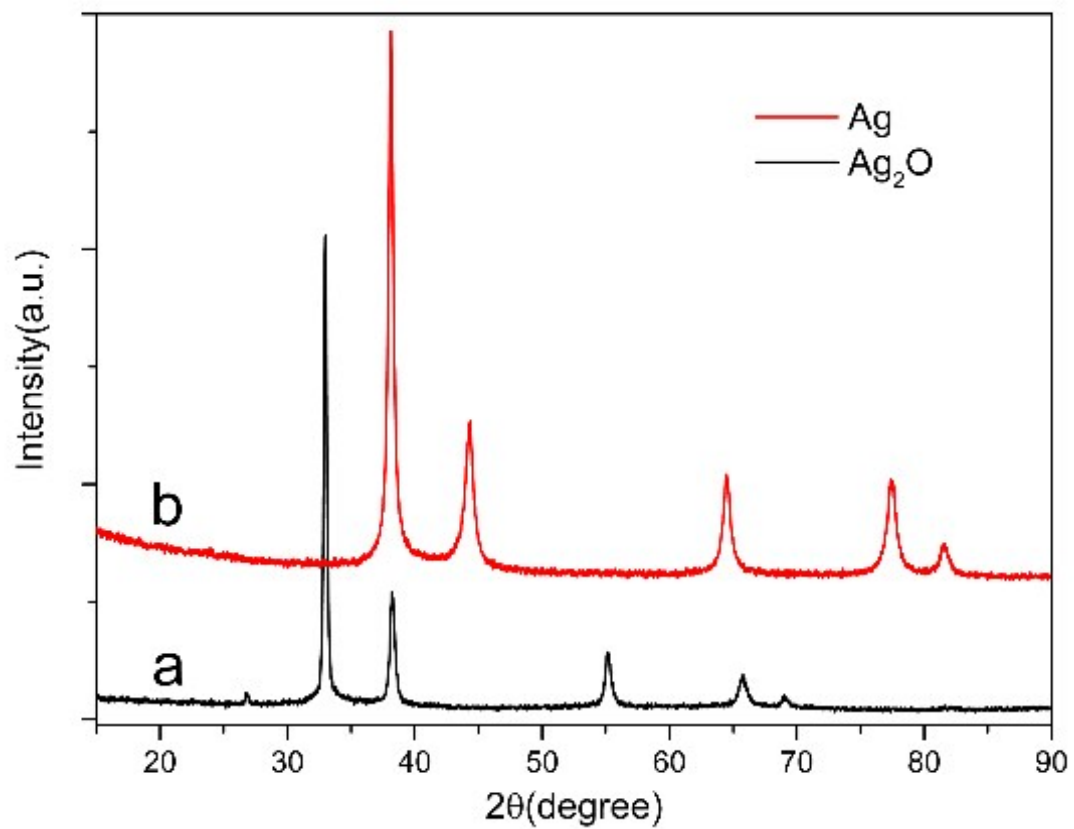

Fig. S3 XRD patterns of samples resulted from the  $\text{Ag}_2\text{O}$  powder in ethanol solution (a) in the absence of NaOH and (b) in the presence of NaOH.

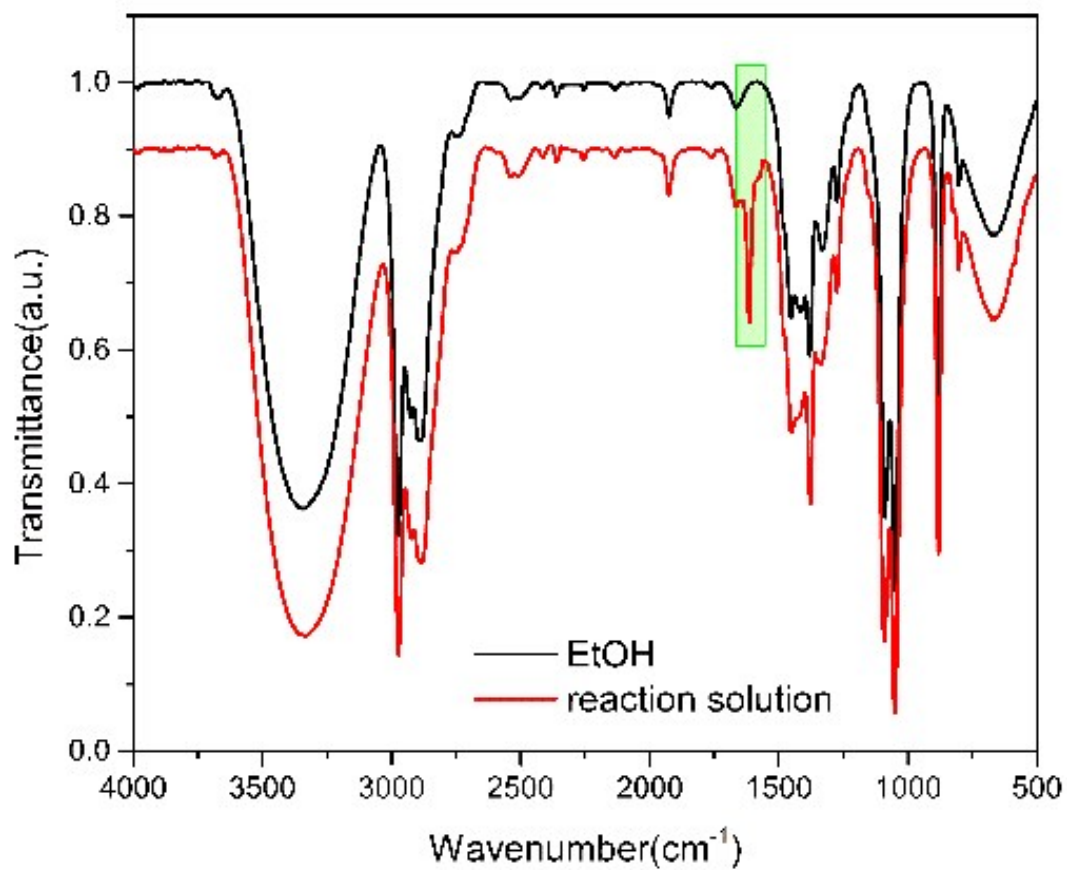

Fig.S4 FTIR spectra of ethanol and the reaction solution.

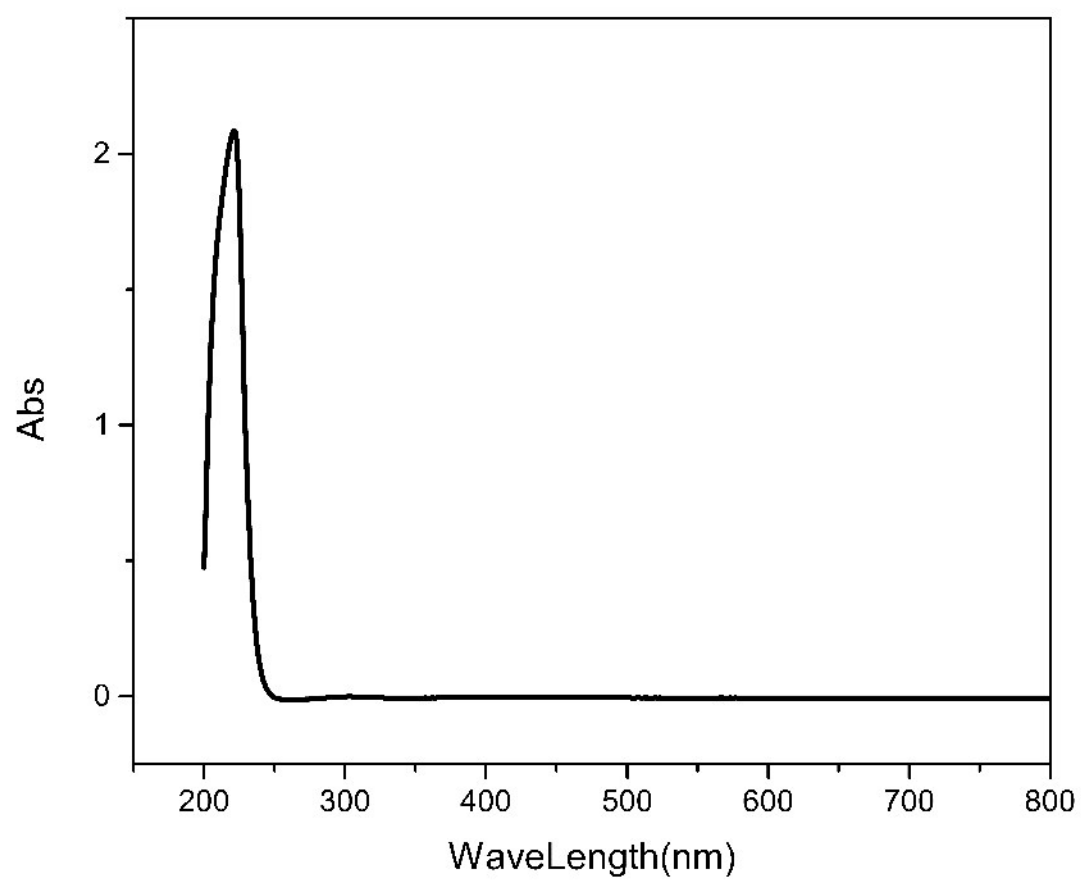

Fig.S5 UV-vis absorption spectrum of the reaction solution.
